# Supplementary material for: Spatial distribution of Madeira Island Laurisilva endemic spiders (Arachnida: Araneae)
Source: Biodivers Data J. 2014 Feb 14;(2):e1051. doi: 10.3897/BDJ.2.e1051 (PMC4030250; doi:10.3897/BDJ.2.e1051)
Supplement: Supplementary material 1 — Species richness data [file biodiversity_data_journal-2-e1051-s001.xls]

## Sheet: Folha1
S	SIE	native	SIE+nat	log(SIE+nat)	introduced	log(EXO)
T01	4	2	6	0.845098	2	0.477121	8
T02	3	3	6	0.845098	4	0.69897	10
T04	5	5	10	1.04139	2	0.477121	12
T06	5	6	11	1.07918	2	0.477121	13
T07	7	5	12	1.11394	2	0.477121	14
T08	2	2	4	0.69897	2	0.477121	6
T09	3	2	5	0.778151	2	0.477121	7
T10	3	1	4	0.69897	2	0.477121	6
T11	5	8	13	1.14613	1	0.30103	14
T12	7	5	12	1.11394	2	0.477121	14
T13	6	5	11	1.07918	2	0.477121	13
T14	5	5	10	1.04139	2	0.477121	12
T17	3	3	6	0.845098	2	0.477121	8
T18	9	5	14	1.17609	3	0.60206	17
T19	0	1	1	0.30103	1	0.30103	2
T21	5	2	7	0.90309	2	0.477121	9
T22	4	1	5	0.778151	2	0.477121	7
T24	3	5	8	0.954243	3	0.60206	11
T25	6	6	12	1.11394	2	0.477121	14
T26	0	3	3	0.60206	2	0.477121	5
T27	2	5	7	0.90309	2	0.477121	9
T28	5	4	9	1	3	0.60206	12
T29	4	2	6	0.845098	2	0.477121	8
T33	7	5	12	1.11394	2	0.477121	14
T34	7	3	10	1.04139	1	0.30103	11
T03	1	1	2	0.477121	2	0.477121	4
T05	0	1	1	0.30103	1	0.30103	2
T15	0	5	5	0.778151	6	0.845098	11
T16	0	3	3	0.60206	7	0.90309	10
T20	1	1	2	0.477121	3	0.60206	5
T23	0	0	0	0	2	0.477121	2
T30	1	1	2	0.477121	1	0.30103	3
T31	0	1	1	0.30103	0	0	1
T32	0	6	6	0.845098	6	0.845098	12
T35	1	0	1	0.30103	2	0.477121	3
T36	1	1	2	0.477121	1	0.30103	3
